# Supplementary material for: Clostridioides difficile S-Layer Protein A (SlpA) Serves as a General Phage Receptor
Source: PubMed Central journal article supplement (PMC10100898; doi:10.1128/spectrum.03894-22), 2023-02-15
Supplement: spectrum.03894-22-s0001.pdf [file spectrum.03894-22-s0001.pdf]

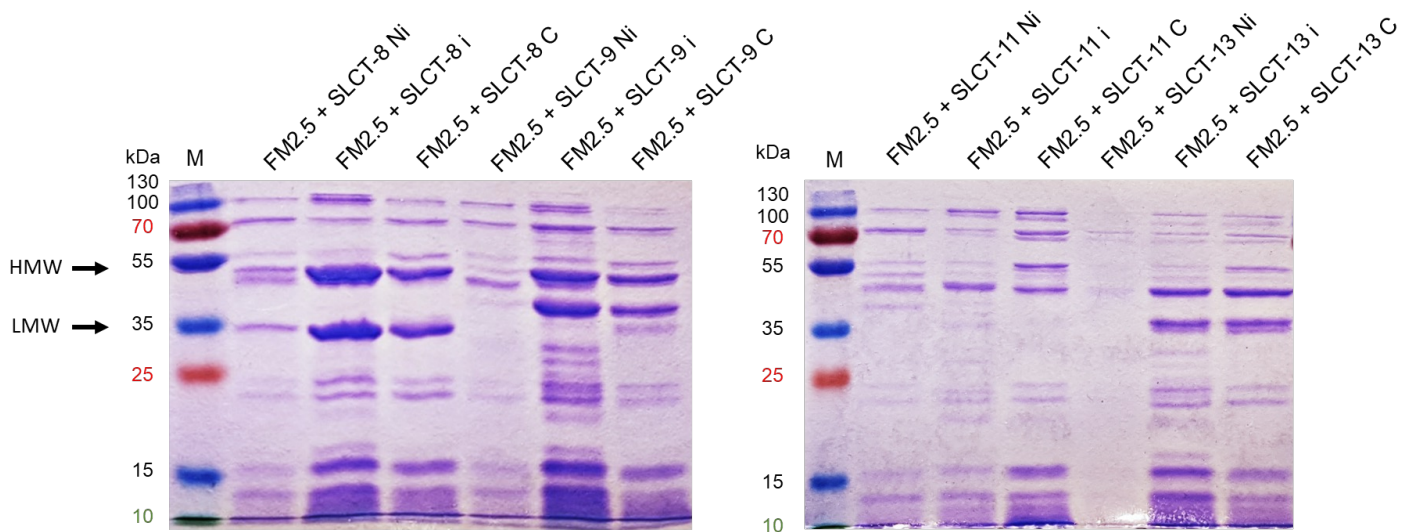

**Supplementary figure 2. Comparison between non-induced, induced, and constitutive expression of different SlpA isoforms.** Coomassie-stained 12% SDS-PAGE showing glycine extractions of surface proteins from FM2.5 mutant strains complemented with plasmids encoding SLCT-8, SLCT-9, SLCT-11 or SLCT-13. These isoforms were under the control of the  $P_{tet}$  tetracycline inducible promoter or the  $P_{cwp2}$  constitutive promoter. Ni = non-induced; i = induced with 20ng/mL anhydrotetracycline; C = constitutive. The arrows indicate the two major bands corresponding to the HMW and LMW fragments from SLCT-8. The size of the bands varies depending on the isoform. (M = marker).
